# Supplementary material for: A healable, recyclable and thermochromic epoxy resin for thermally responsive smart windows
Source: Royal Society of Chemistry journal article supplement (doi:10.1039/d1py01657a), 2022-01-01
Supplement: d1py01657a1.pdf [file d1py01657a1.pdf]

## Supporting information

### **A healable, re-cyclable and thermochromic epoxy resin for thermal-responsive smart windows**

*Qi-Sheng Huang<sup>a</sup>, Pei-Chen Zhao<sup>a</sup>, Jian-Cheng Lai<sup>a</sup>, Xiao-Peng Zhang<sup>b</sup>, Cheng-Hui  
Li<sup>a,\*</sup>*

*<sup>a</sup>State Key Laboratory of Coordination Chemistry, School of Chemistry and Chemical  
Engineering, Nanjing National Laboratory of Microstructures, Collaborative  
Innovation Center of Advanced Microstructures, Nanjing University, Nanjing 210023,  
P. R. China.*

*<sup>b</sup>Key Laboratory of Water Pollution Treatment and Resource Reuse of Hainan  
Province, Haikou 571158, P. R. China.*

\*Corresponding authors

E-mail: [chli@nju.edu.cn](mailto:chli@nju.edu.cn)

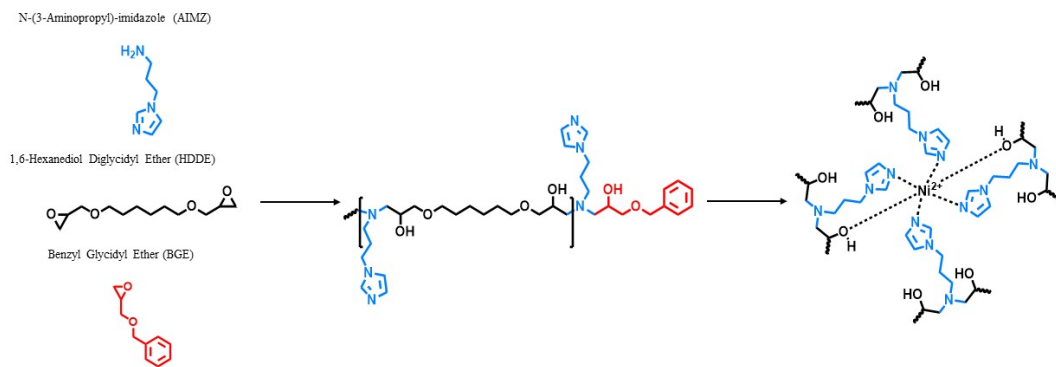

**Figure S1.** Scheme of synthetic route.

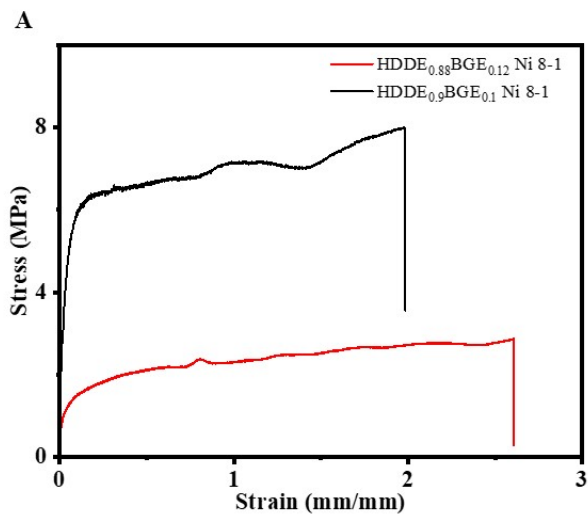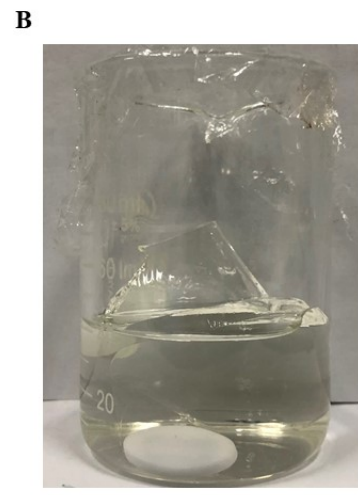

**Figure S2.** A. stress-strain curves of HDDE<sub>0.88</sub>BGE<sub>0.12</sub> Ni 8-1 and HDDE<sub>0.90</sub>BGE<sub>0.10</sub> Ni 8-1 at stretching speed of 10 mm/min; B. image of HDDE<sub>0.92</sub>BGE<sub>0.08</sub>-IMZ.

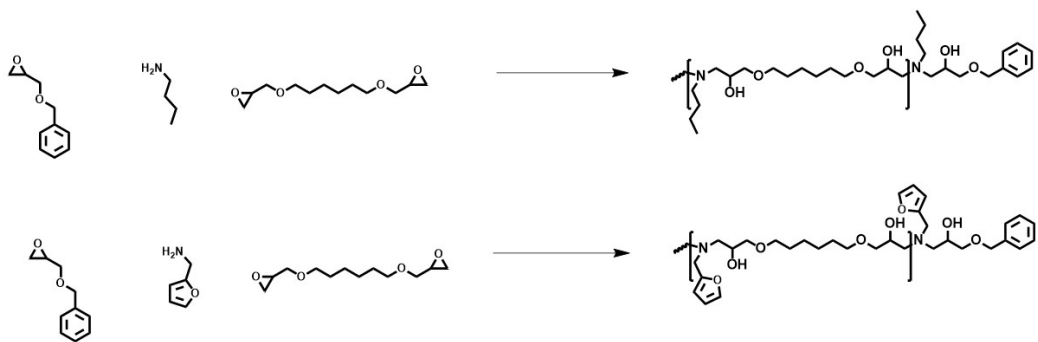

**Figure S3.** Synthetic route of HDDE<sub>0.9</sub>BGE<sub>0.1</sub>-BA (Top) and HDDE<sub>0.9</sub>BGE<sub>0.1</sub>-FFA (Bottom).

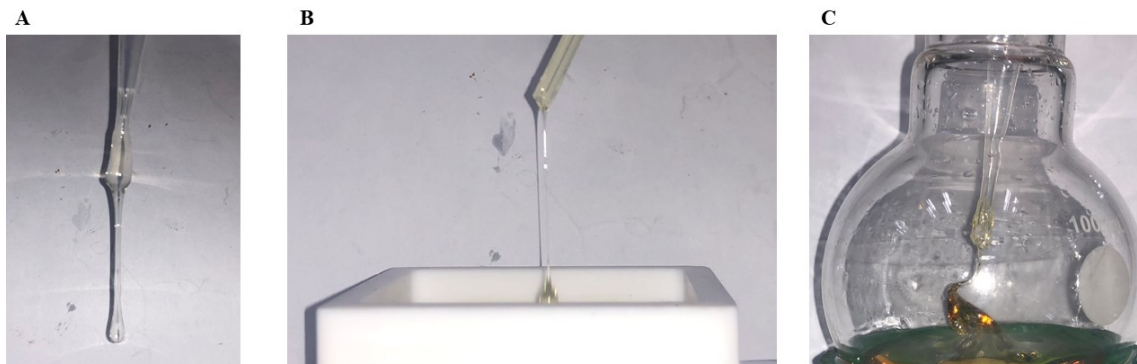

**Figure S4.** Images of HDDE<sub>0.9</sub>BGE<sub>0.1</sub>-BA (A); HDDE<sub>0.9</sub>BGE<sub>0.1</sub>-FFA (B); HDDE<sub>0.9</sub>BGE<sub>0.1</sub>-IMZ (C).

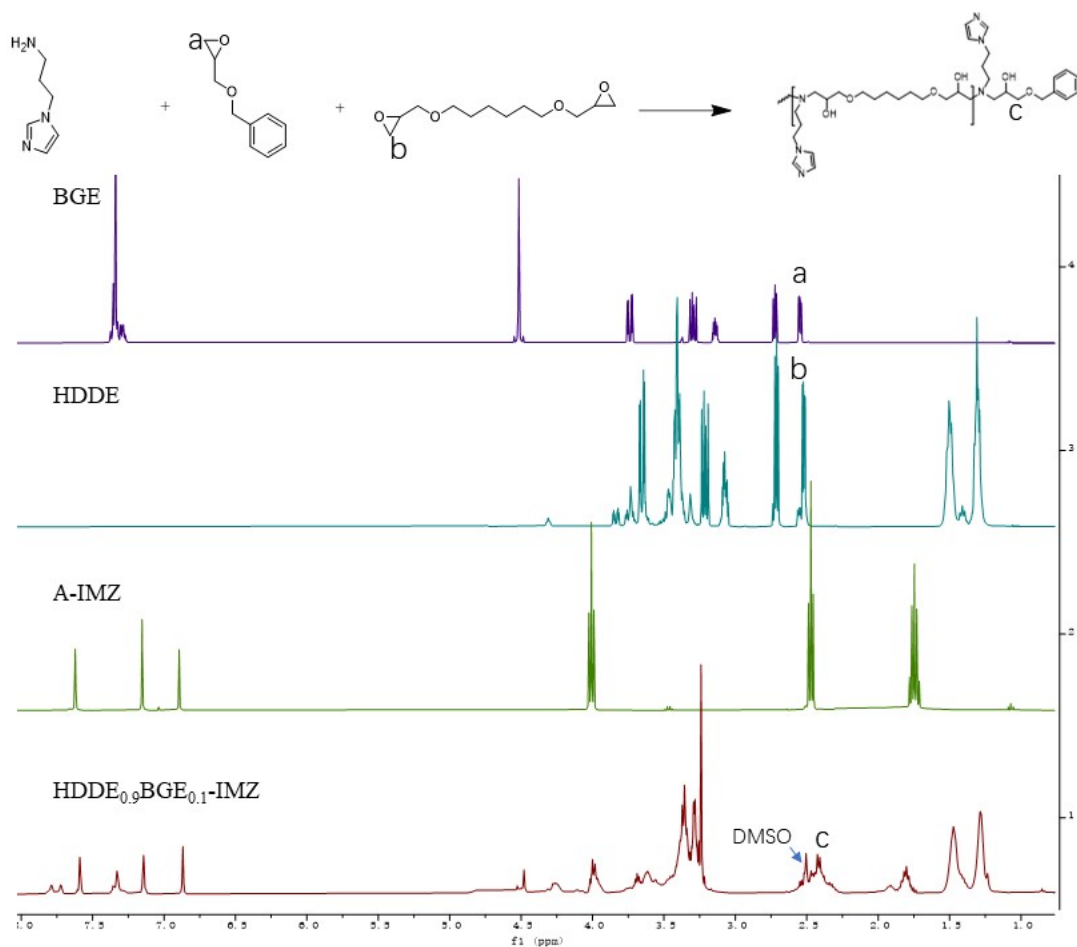

**Figure S5.** <sup>1</sup>H NMR of BGE, HDDE, AIMZ, HDDE<sub>0.9</sub>BGE<sub>0.1</sub>-IMZ (400MHz, DMSO), a, b, c represents the characteristic peaks of epoxy resin of BGE, HDDE, HDDE<sub>0.9</sub>BGE<sub>0.1</sub>-IMZ, respectively.

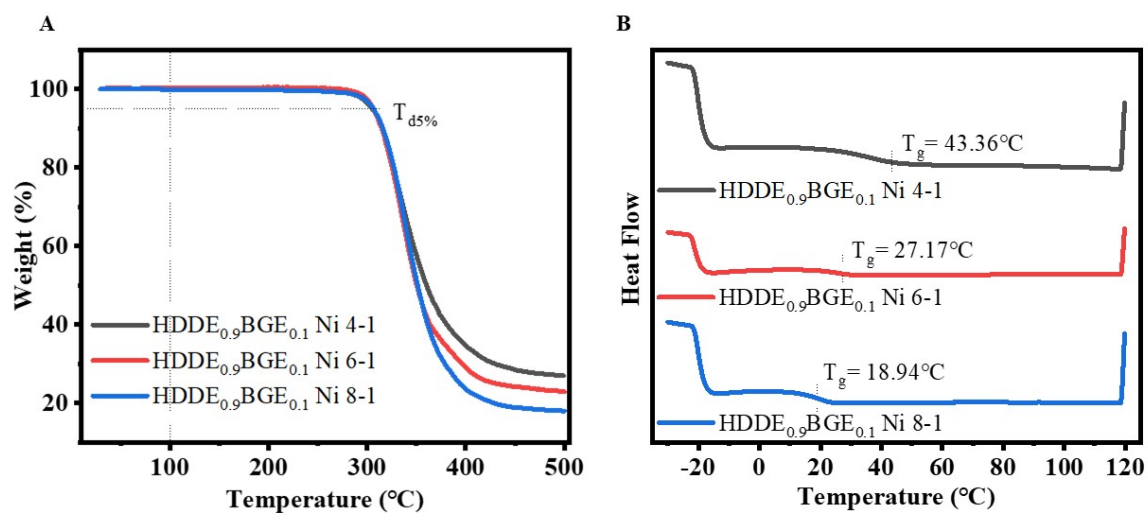

**Figure S6.** A. TG curves of epoxy resin with different cross-link densities; B. DSC curves of epoxy resin with different cross-link densities.

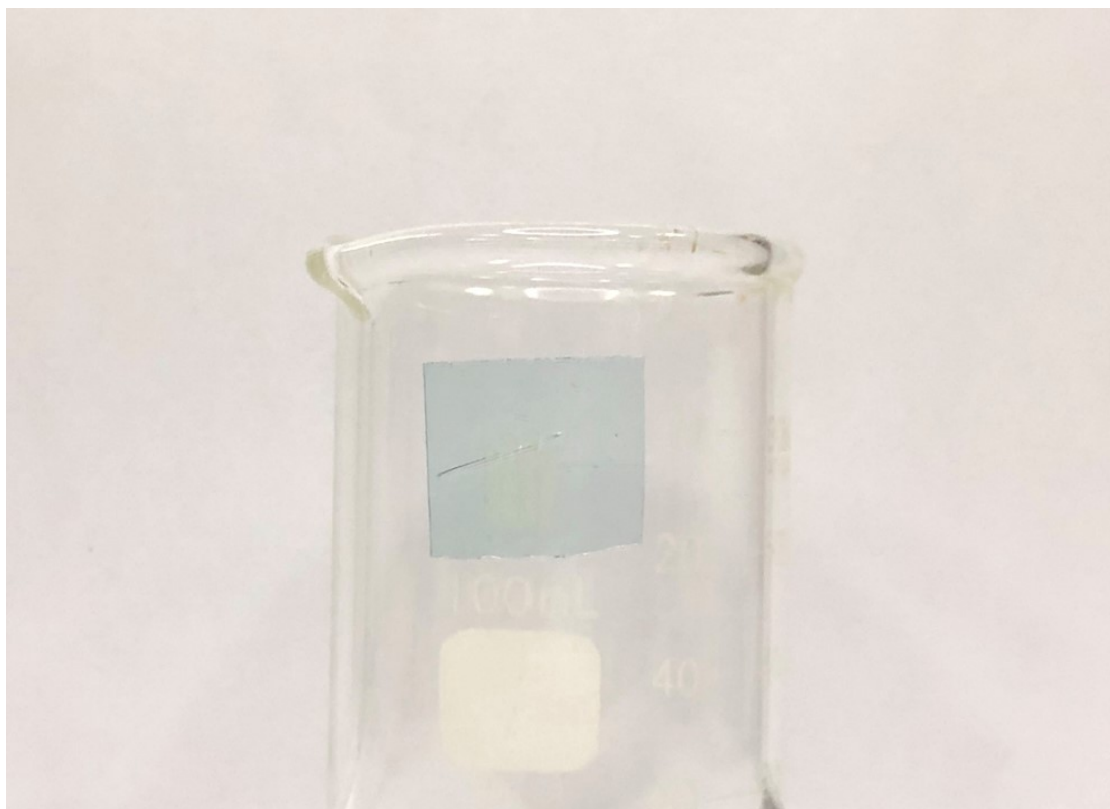

**Figure S7.** The sample self-adapts to the irregular surface.



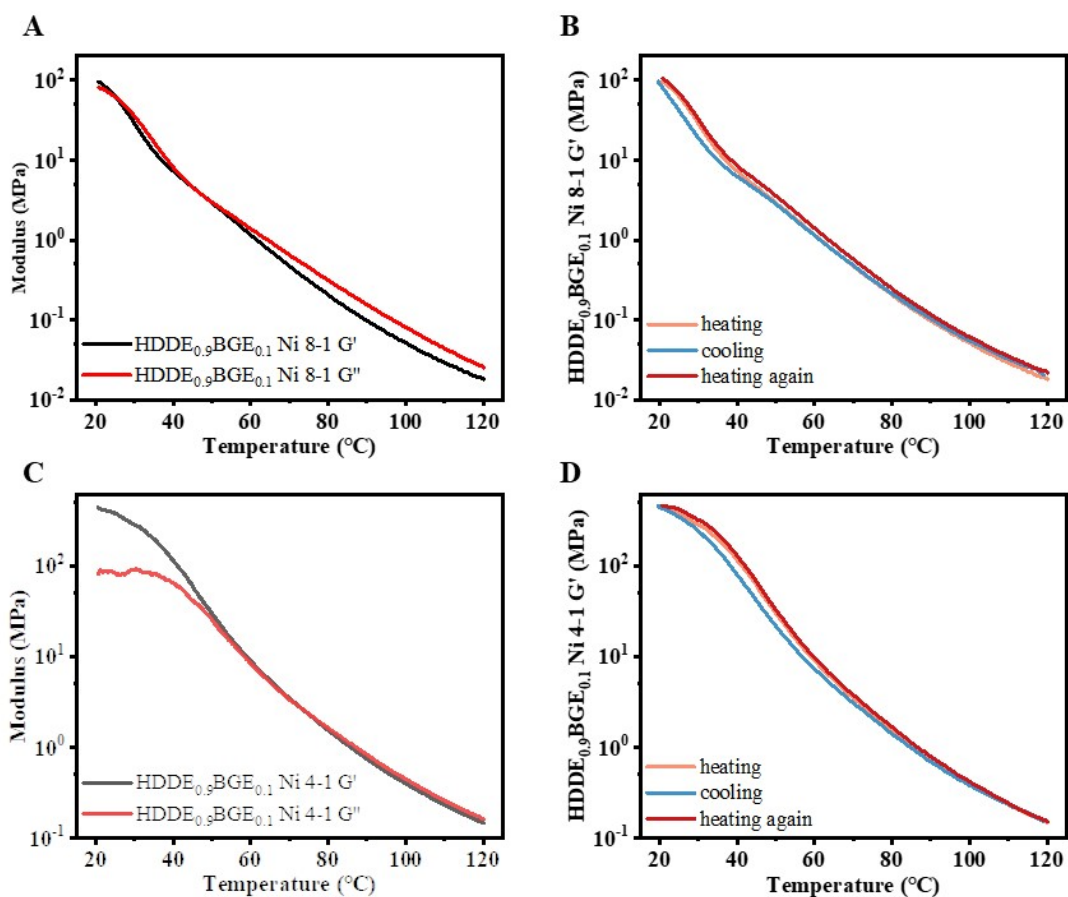

**Figure S8.** A, C. temperature dependent rheology measurements of HDDE<sub>0.9</sub>BGE<sub>0.1</sub> Ni 8-1 and 4-1; B, D. cyclic temperature-sweep rheology measurements of HDDE<sub>0.9</sub>BGE<sub>0.1</sub> Ni 8-1 and 4-1 (temperature changing rate 2 °C/min).

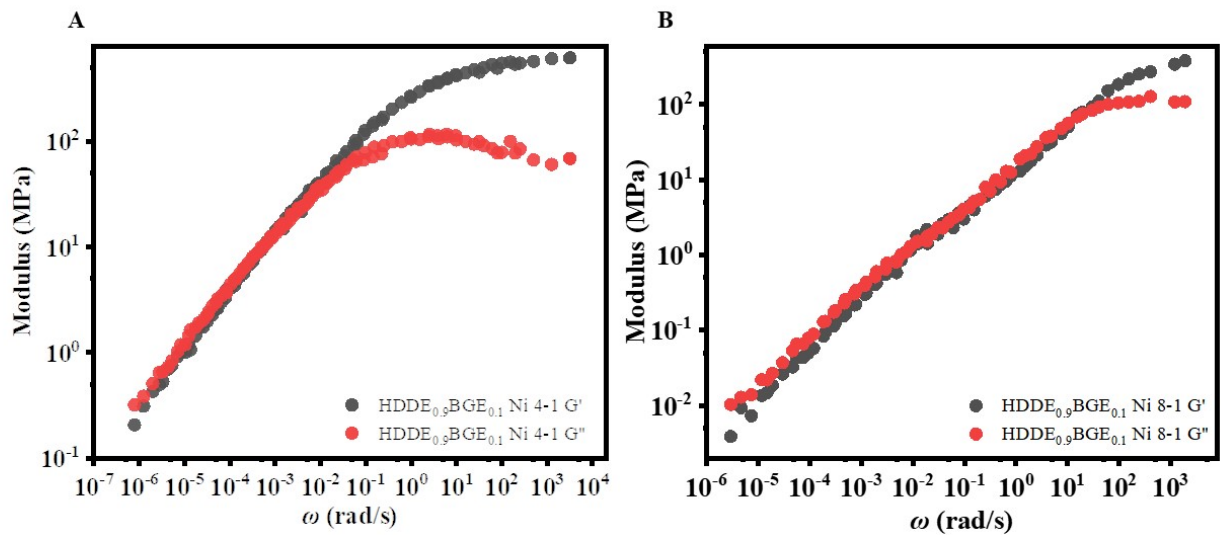

**Figure S9.** Master curves of HDDE<sub>0.9</sub>BGE<sub>0.1</sub> Ni 4-1 (A), HDDE<sub>0.9</sub>BGE<sub>0.1</sub> Ni 8-1 (B) at a reference temperature of 25 °C.

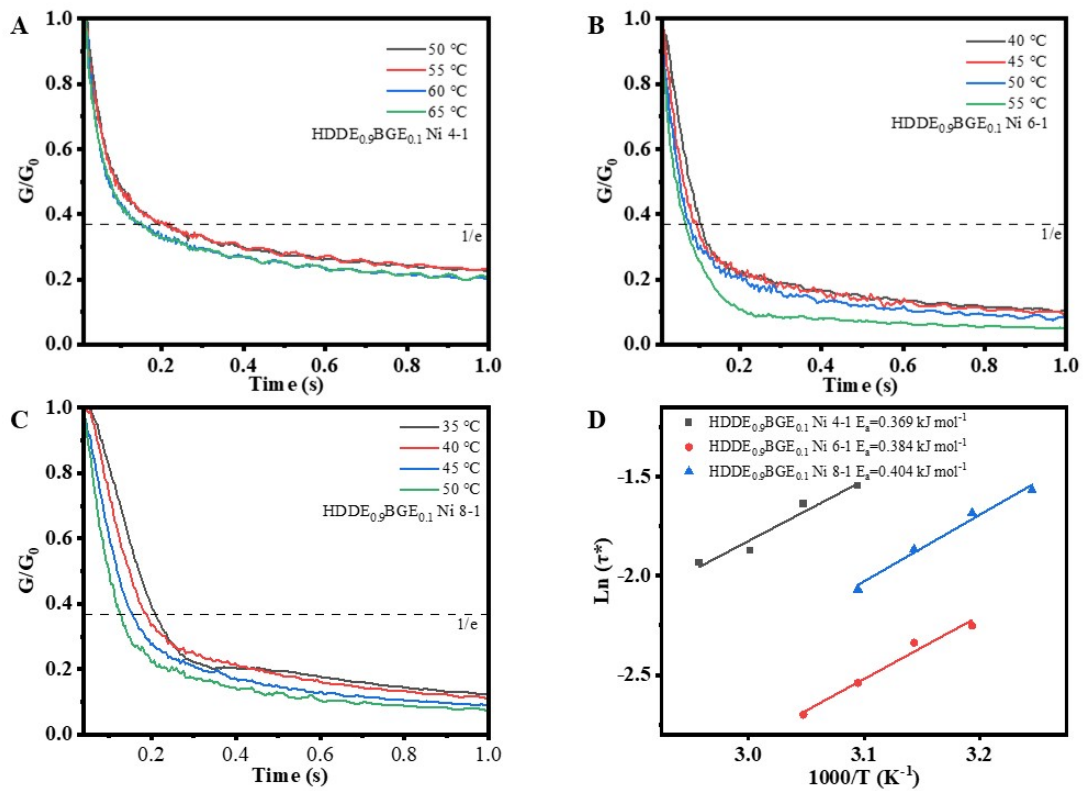

**Figure S10.** Stress relaxation of epoxy resin at different temperatures A. HDDE<sub>0.9</sub>BGE<sub>0.1</sub> Ni 4-1; B. HDDE<sub>0.9</sub>BGE<sub>0.1</sub> Ni 6-1; C. HDDE<sub>0.9</sub>BGE<sub>0.1</sub> Ni 8-1; D. arrhenius plots of the characteristic relaxation time  $\tau^*$  versus  $1000/T$  for epoxy resin.

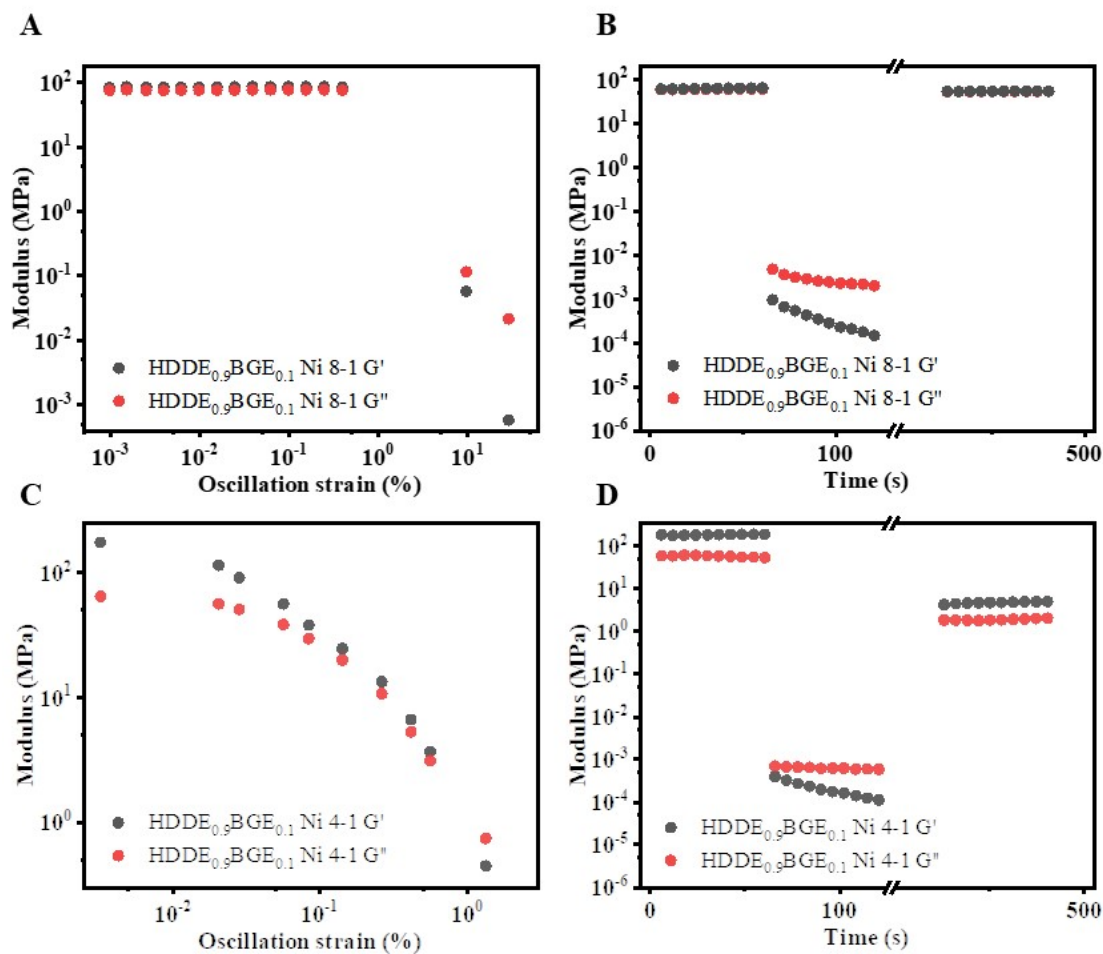

**Figure S11.** A. storage modulus ( $G'$ ) and loss modulus ( $G''$ ) versus oscillation of HDDE<sub>0.9</sub>BGE<sub>0.1</sub> Ni 8-1; B. continuous amplitude sweep experiment of HDDE<sub>0.9</sub>BGE<sub>0.1</sub> Ni 8-1, small amplitude scans (0.01 %), and large amplitude scans (10 %); C storage modulus ( $G'$ ) and loss modulus ( $G''$ ) versus oscillation of HDDE<sub>0.9</sub>BGE<sub>0.1</sub> Ni 4-1; D. continuous amplitude sweep experiment of HDDE<sub>0.9</sub>BGE<sub>0.1</sub> Ni 4-1, small amplitude scans (0.001 %), and large amplitude scans (1 %).

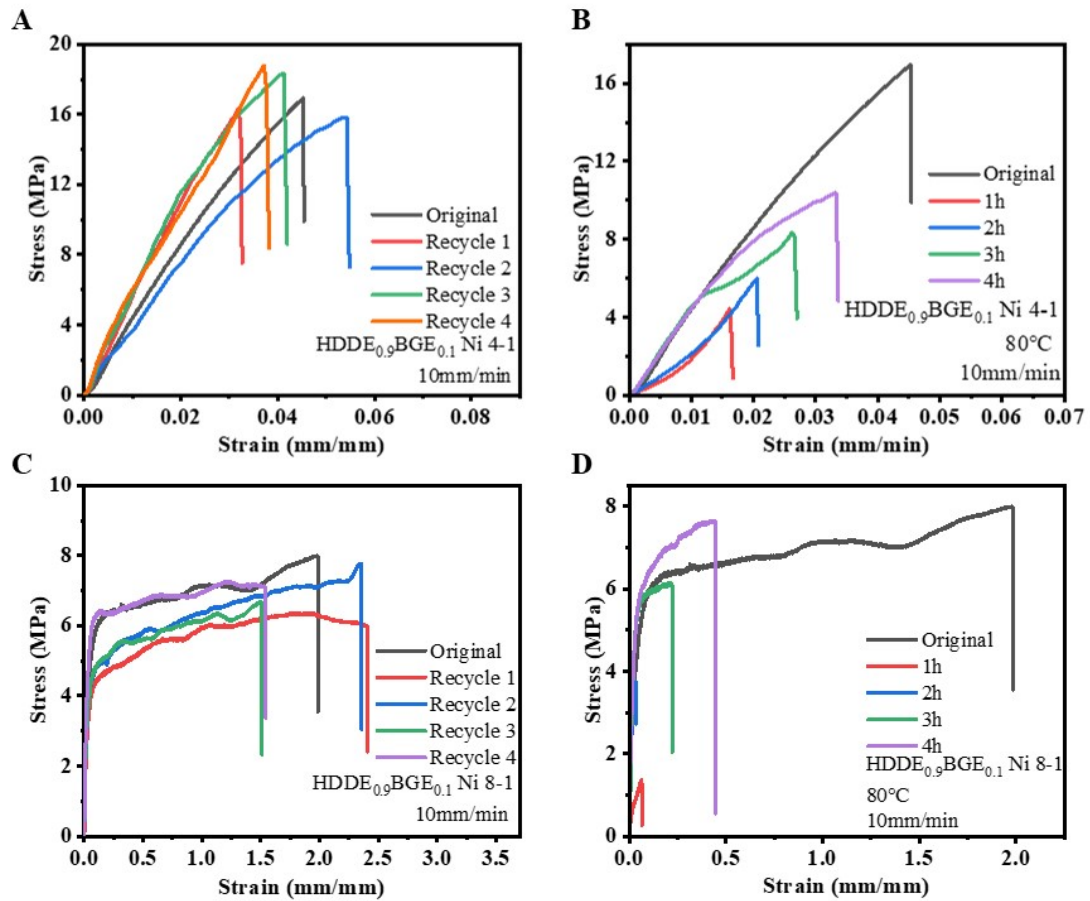

**Figure S12.** A. stress-strain curves of the original and recycle of HDDE<sub>0.9</sub>BGGE<sub>0.1</sub> Ni 4-1; B. stress-strain curves of the original and self-healing of HDDE<sub>0.9</sub>BGE<sub>0.1</sub> Ni 4-1; C. stress-strain curves of the original and recycle of HDDE<sub>0.9</sub>BGE<sub>0.1</sub> Ni 8-1; D. stress-strain curves of the original and self-healing of HDDE<sub>0.9</sub>BGE<sub>0.1</sub> Ni 8-1;

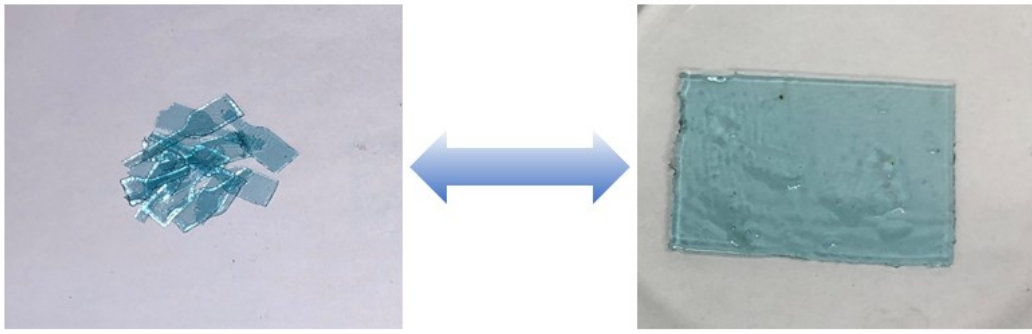

**Figure S13.** Recycle of coordination bonds modified epoxy resin.

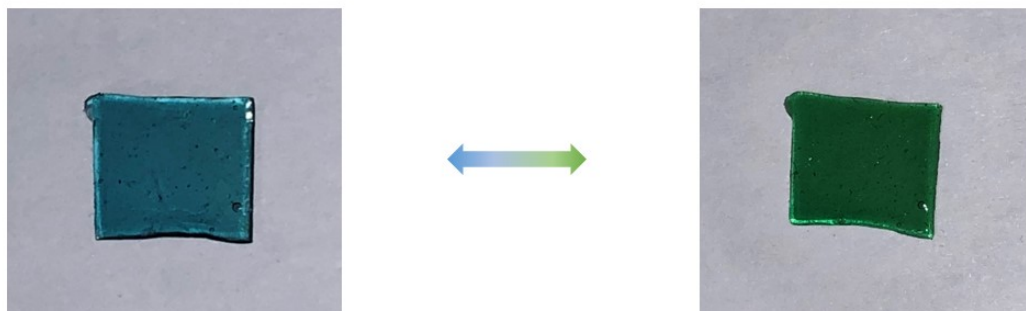

**Figure S14.** The color of the sample changes reversibly between room temperature (bright blue) and 100 °C (dark green).

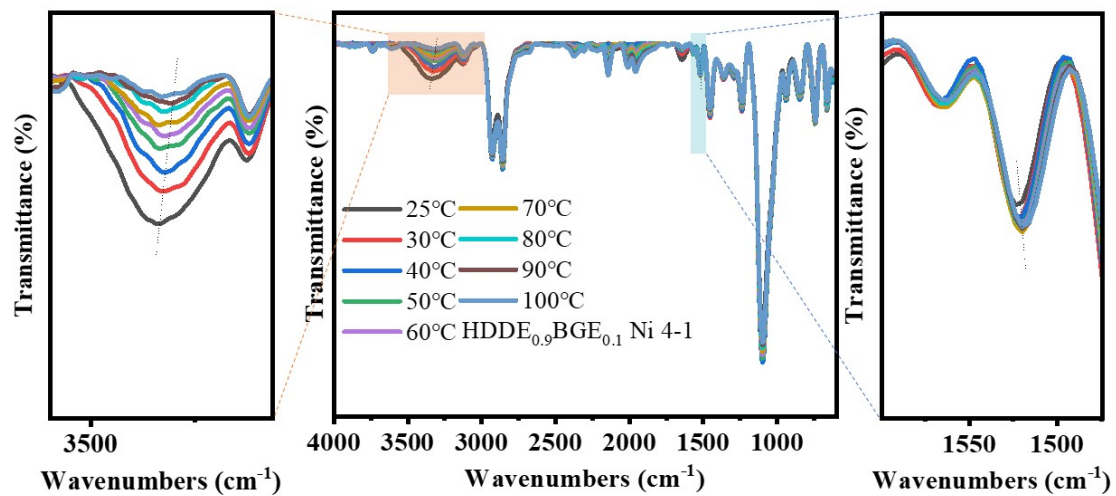

**Figure S15.** Variable temperature Fourier-transform infrared spectroscopy of HDDE<sub>0.9</sub>BGE<sub>0.1</sub> Ni 4-1.



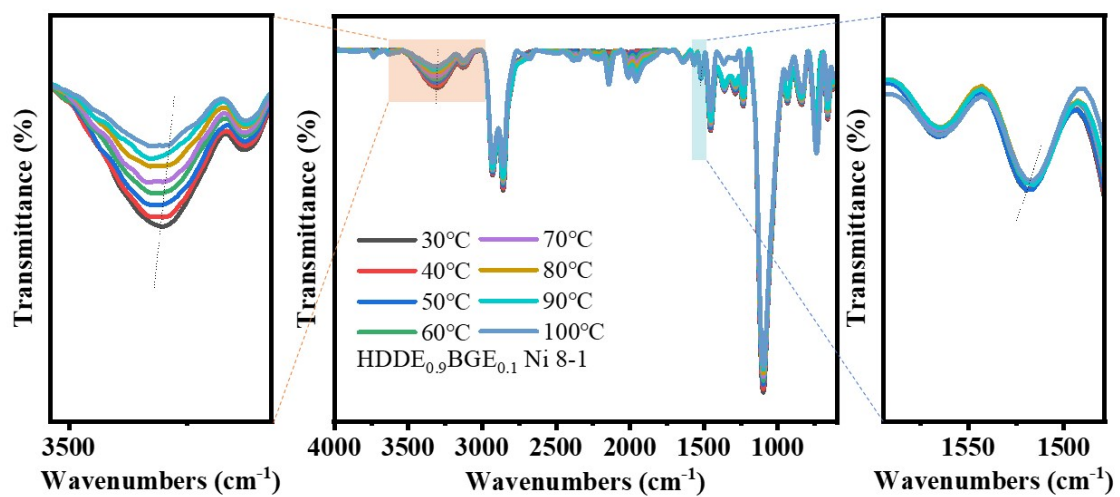

**Figure S16.** Variable temperature Fourier-transform infrared spectroscopy of HDDE<sub>0.9</sub>BGE<sub>0.1</sub> Ni 8-1.

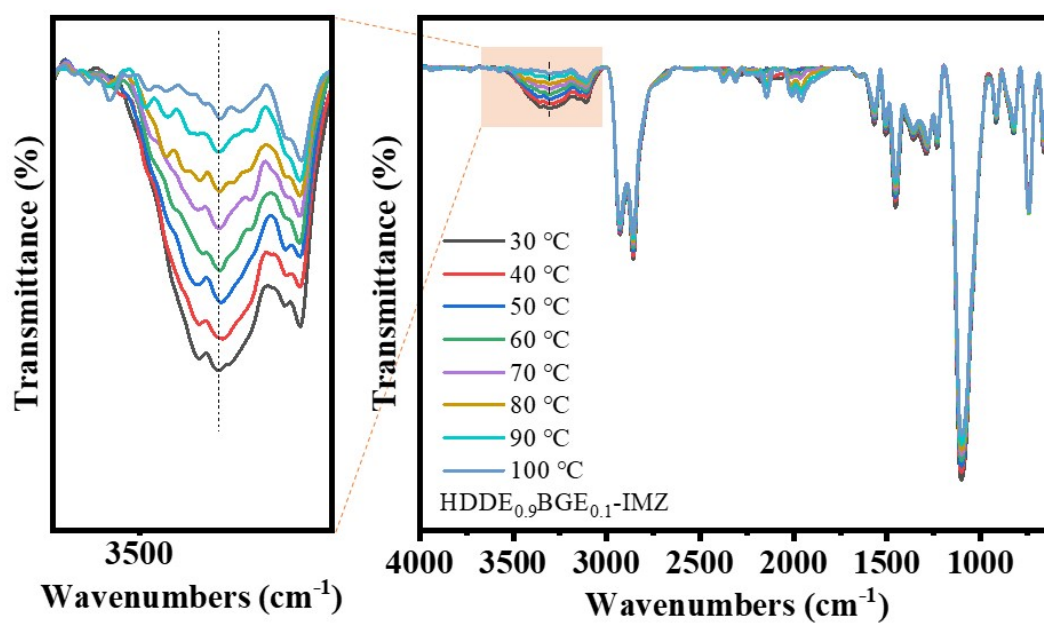

**Figure S17.** Variable temperature Fourier-transform infrared spectroscopy of  $\text{HDDE}_{0.9}\text{BGE}_{0.1}\text{-IMZ}$ .

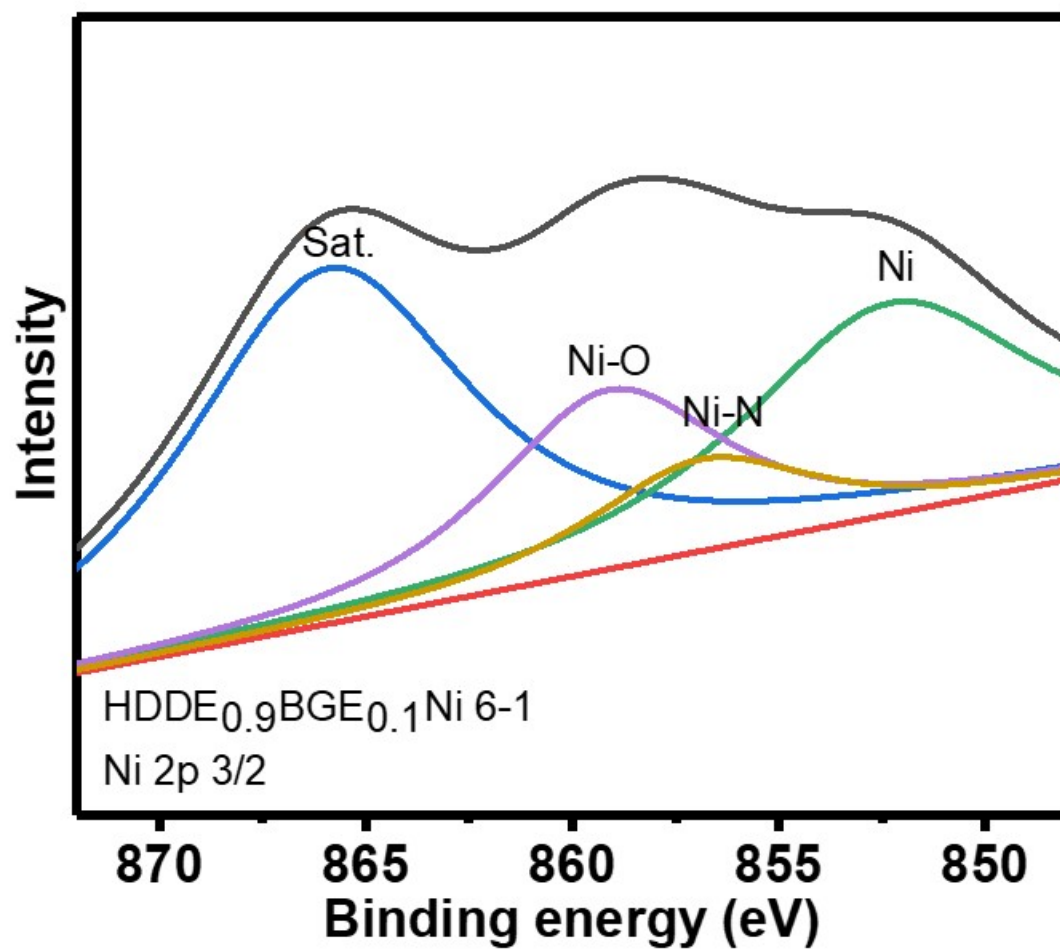

Figure S18. Ni 2p 3/2 XPS spectra of HDDE<sub>0.9</sub>BGE<sub>0.1</sub> Ni 6-1.

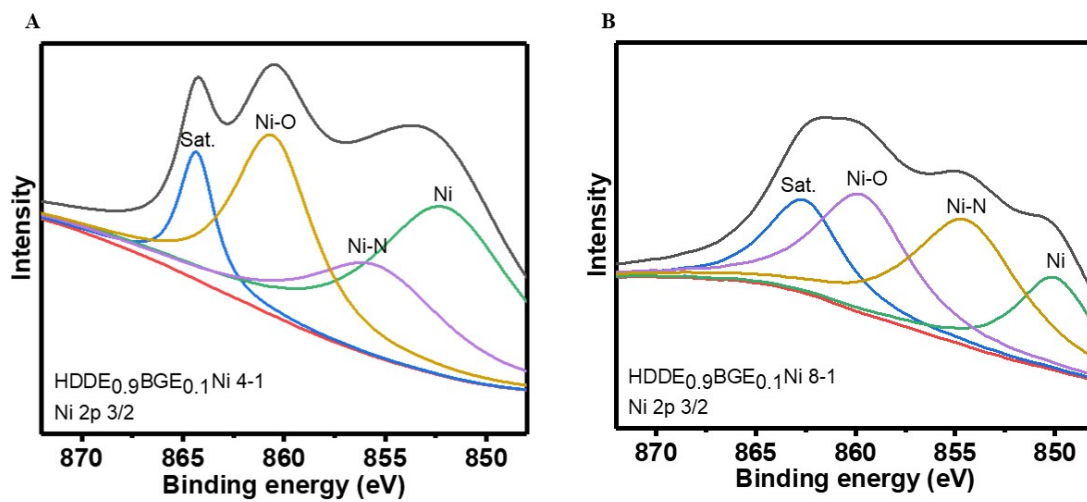

**Figure S19.** Ni 2p 3/2 XPS spectra of HDDE<sub>0.9</sub>BGE<sub>0.1</sub>Ni 4-1 (A); HDDE<sub>0.9</sub>BGE<sub>0.1</sub>Ni 8-1 (B).

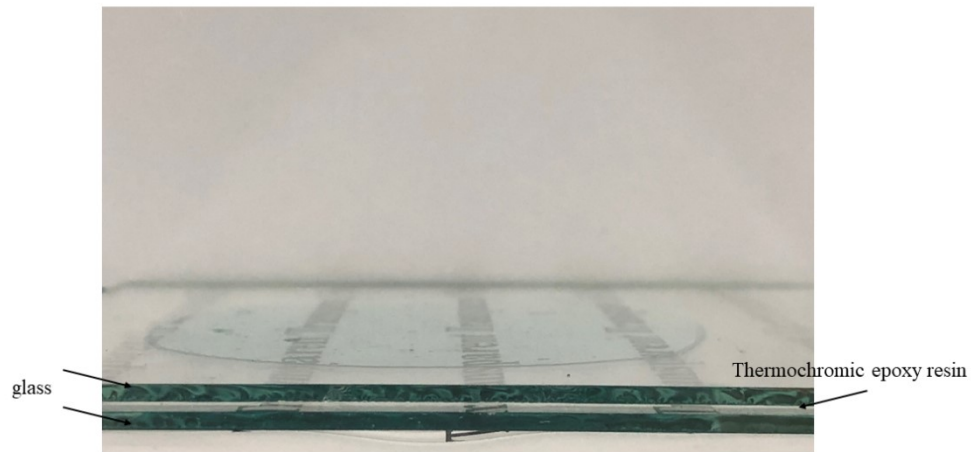

**Figure S20.** The scheme of a simulate smart window.

## **Supporting movie**

**Supporting movie1.** The color changes from bright blue to dark green as the temperature rises from room temperature to 100 °C.

**Supporting movie2.** The color changes from dark green to bright blue as the temperature drops from 100 °C to room temperature.
